# Supplementary material
Source: HighWire-hosted journal article supplement (https://hw-f5-jim.highwire.org/content/69/3/761)
Supplement: inline-supplementary-material-1 [file inline-supplementary-material-1.pdf]

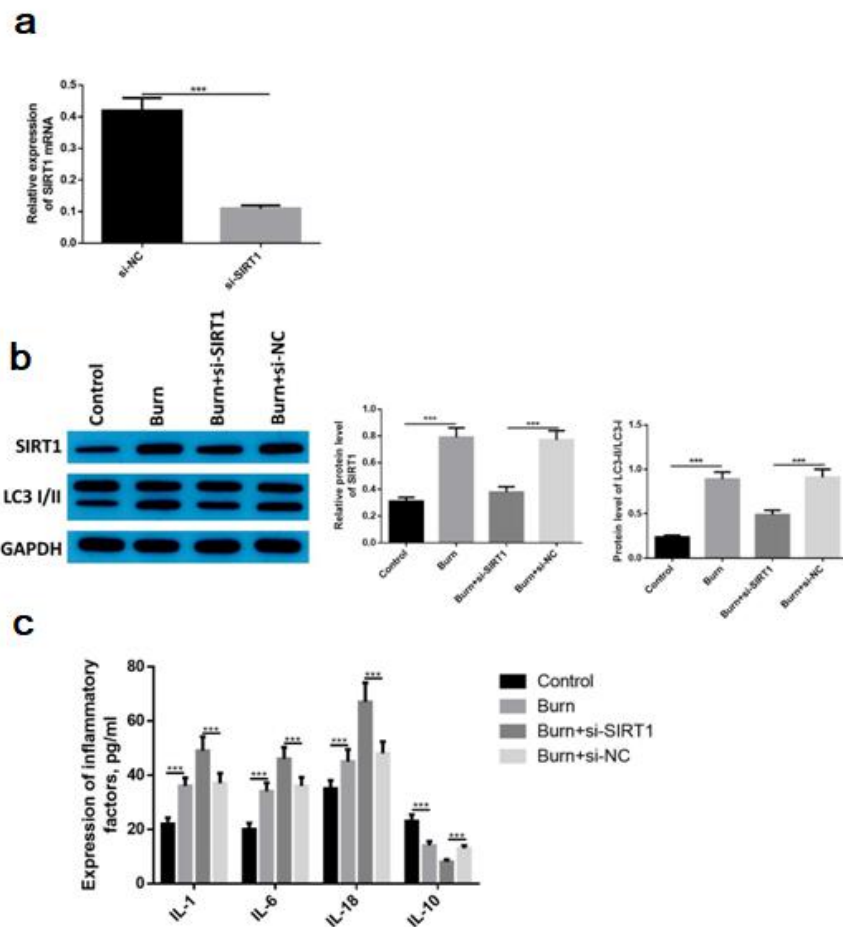

**Figure S1.** (A) RAW264.7 cells were transfected with si-SIRT1 or si-NC, and then qRT-PCR analysis was performed to determine the transfection efficiency. RAW264.7 cells were transfected with si-SIRT1 or si-NC before exposure to serum collected from burned or normal mice for 48h. The mRNA and protein levels of SIRT1, as well as the ratio of LC3-II/LC3-I at mRNA and protein levels (B) and the production of IL-1, IL-6, IL-10, and IL-18 (C) were determined in these cells. \*\*\* $P < 0.001$ .
